# Supplementary material
Source: PubMed Central journal article supplement (PMC3725467)
Supplement: NIHMS458922-supplement-Supplemental_Material.pdf [file NIHMS458922-supplement-Supplemental_Material.pdf]

**Prevention and Adolescent Friendship Networks:  
Effects on the Influence Potential of Prosocial Versus Antisocial Youth**

**Supplemental Material**

Random assignment and assessment process for PROSPER

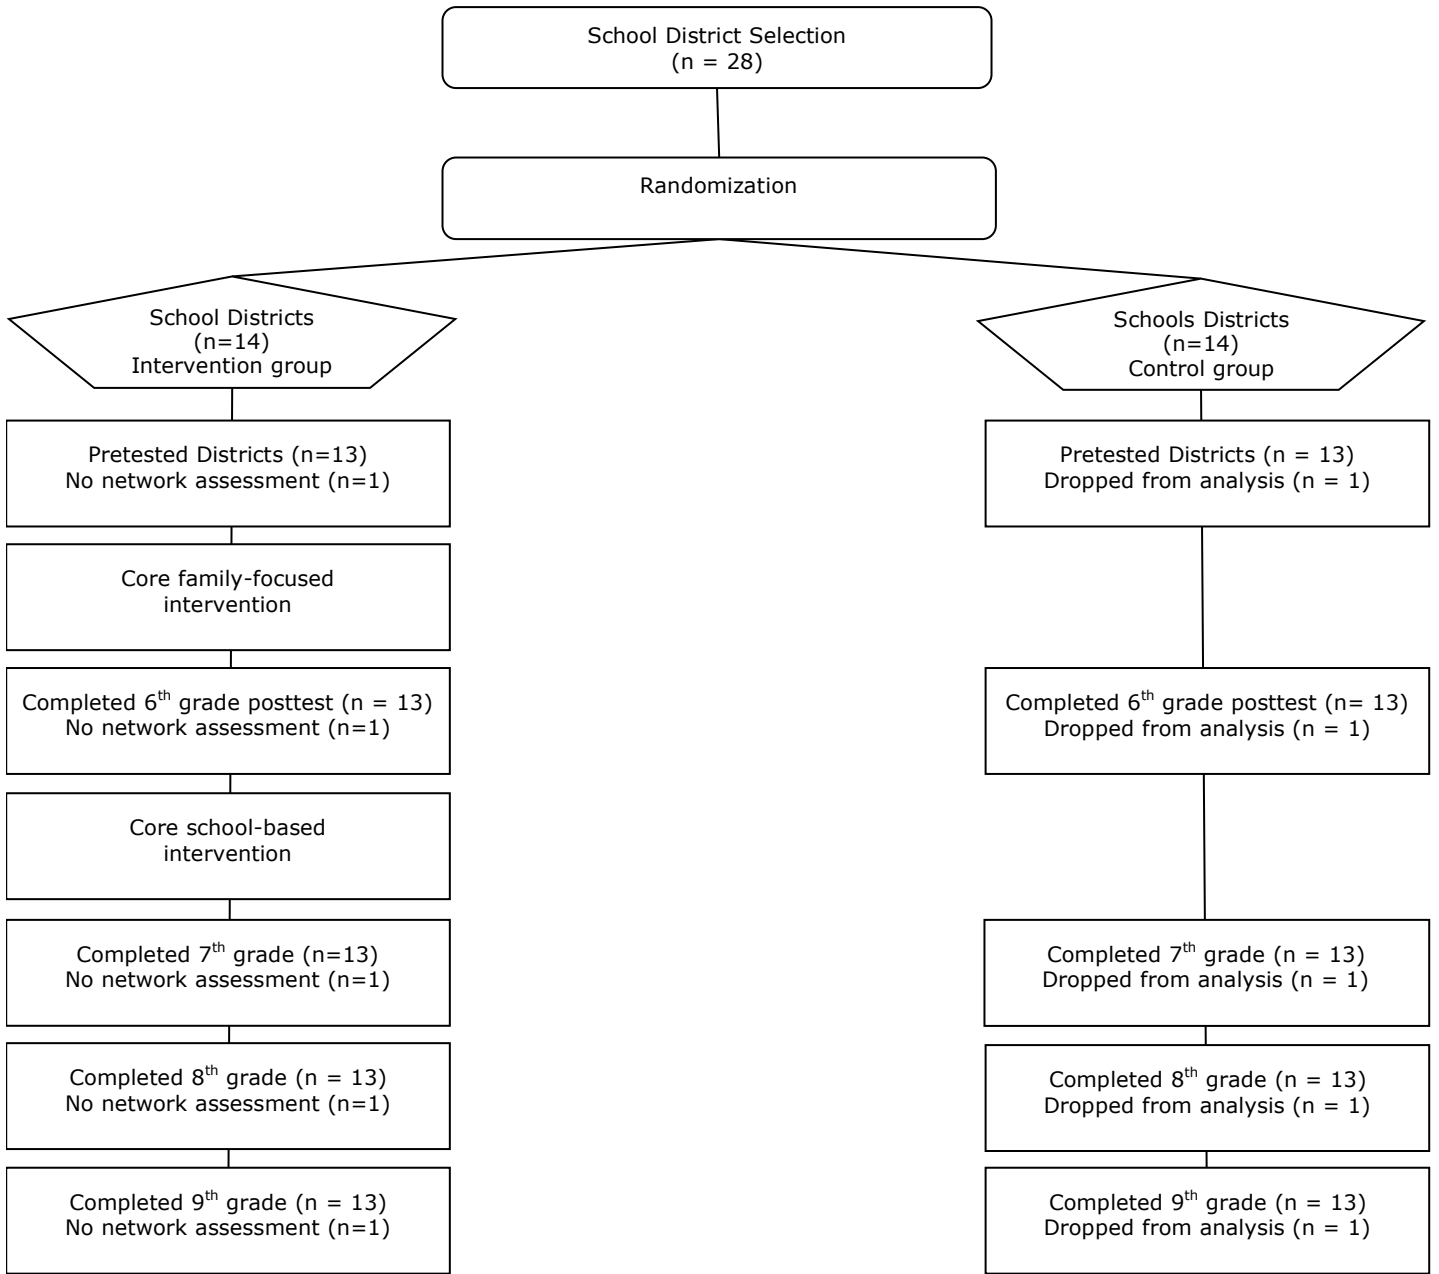

## Formulas and Definitions for Centrality Measures

*Degree*: The number of individuals with friendship ties to the target individual.

*Closeness centrality*: Mean of inverted distance from all others in the network. Formula:

$$C_{Ci} = \frac{\sum (\frac{1}{d_{ij}})}{N - 1}$$

Where  $d_{ij}$  is the distance from  $i$  to  $j$  (the minimum number of friendship links by which they are connected) and  $N$  is the number of individuals in the network. If  $i$  cannot reach  $j$ , then  $d_{ij}$  is infinite and  $(1/d_{ij}) \rightarrow 0$ .

*Reach (in two steps)*: The number of people the individual can reach within two steps, which corresponds to the count of friends and friends of friends.

*Bonacich centrality*: Weights each individual's centrality by the centrality of the nodes they are connected to. The measure is formally expressed as:

$$C(\alpha, \beta) = \alpha(I - \beta A)^{-1} A \mathbf{1}$$

Where  $\mathbf{A}$  is the adjacency matrix,  $\mathbf{I}$  is the identity matrix, and  $\mathbf{1}$  is a column vector of 1s. The score is controlled by two parameters:  $\alpha$  which is a normalizing constant chosen to ensure that the sum of squared scores equals the number of nodes.<sup>1</sup> The power score,  $\beta$ , controls how much influence nodes at further distances have on the score. This weight can be no larger than the reciprocal of the largest eigenvalue of the network, and for consistency we use a  $\beta$  value of  $(0.75) \times \text{largest eigenvalue}$ . As with *Information Centrality*, we treat the network as symmetric and exclude isolates and isolated dyads.

*Information Centrality*: Based on total connectivity, along all paths, between every pair in the network. Wasserman and Faust provide for calculation details.<sup>2</sup> To calculate, first define a new matrix  $\mathbf{B}$  from the adjacency matrix ( $\mathbf{A}$ ) such that the diagonal is equal to the degree plus 1 and the off-diagonal cells are equal to 0 if  $\mathbf{I}$  is incident with  $j$ , zero otherwise:

$$B_{ij} = 1 - A_{ij}$$

$$B_{ii} = \sum_{j=1}^n A_{ij} + 1$$

Then define  $\mathbf{C}$  as the inverse of  $\mathbf{B}$ ,  $T$  as the trace of  $\mathbf{C}$ , and  $R$  as the sum of an off-diagonal row of  $\mathbf{C}$ :

$$C = B^{-1}$$

$$T = \sum_{i=1}^n C_{ii}$$

$$R = \sum_{j=1}^n C_{ij}$$

Then information centrality is:

$$I_i = \frac{1}{c_{ii} + (T - 2R)/n}$$

Since information centrality requires an invertible matrix, we use only the symmetric network ignoring the direction of the friendship direction. We exclude isolates and isolated dyads to ensure an invertible matrix.

*Betweenness centrality*: Captures the individual's ability to block flow between others. It is determined by the extent to which the individual sits on the shortest paths between pairs of other nodes. Specifically, betweenness centrality is computed as the proportion of the shortest friendship paths between all other pairs of individuals that pass through this individual:

$$C_B(n_i) = \sum_{j < k} g_{jk}(n_i) / g_{jk}$$

Where  $g_{jk}$  is the number of shortest paths connected nodes  $j$  and  $k$ , and  $g_{jk}(n_i)$  is the number of such paths that node  $i$  is part of.

1. Bonacich P. Power and centrality: A family of measures. *Am J of Sociol.* 1987;92(5):1170-1182.
2. Wasserman S, Faust K. *Social Network Analysis : Methods and Applications*. Cambridge: Cambridge University Press; 1994.

*Transformations of Centrality Measures to  
Reduce Skewness, Outliers, and Variance Dependent on Network Size*

In all equations, \* indicates the transformed index,  $i$  is the individual adolescent, and  $n_j$  is the number of adolescent respondents in the network

*Total degree:* The distribution was not dependent on network size and it was reasonably symmetric with the exception of positive outliers. Scores above 15 (0.3% of cases and 3.5  $SD$  above the mean) were recoded to 15.

*In degree:* A square transformation adequately reduced skewness and outliers. Variance was relatively homogeneous in relation to network size.

$$ID_i^* = \sqrt{ID_i}$$

*Closeness centrality, undirected:* Isolates had received scores of zero, which made them extreme outliers, and they were therefore coded to the next lowest scores, which was .16. Dependence of variance on network size was reduced by multiplying by the ratio of the network size to the mean network size. The skew of the measure was reduced by taking the cube root of the result.

$$C_{U,i}^* = \sqrt[3]{C_{U,i} \frac{n_j}{186}}$$

*Closeness centrality, incoming:* Dependence of variance on network size was reduced by multiplying by the ratio of the network size to the mean network size. The skew of the measure was reduced by taking the cube root of the result.

$$C_{I,i}^* = \sqrt[3]{C_{I,i} \frac{n_j}{186}}$$

*Reach, undirected:* For relatively small school cohorts, the variance of this measure was reduced in smaller networks due to the limited number of potential friends. Therefore, in networks with fewer than 150 students we multiplied scores by a factor that diminished toward one as size approached 150.

$$\text{If } n_j < 150, R_{U,i}^* = R_{U,i} \sqrt{\frac{160}{n_j + 10}}$$

In addition, outliers were reduced by recoding values above 65 to 65 (the top 0.5% and 2.9  $SD$  above the mean).

*Reach, incoming:* As with undirected reach, the variance of this measure was reduced in smaller networks by the limited number of potential friends. In this case, however, that effect was concentrated in networks of 100 students or less, given the smaller range of the measure itself. Therefore, in networks with fewer than 100 students we multiplied scores by a factor that diminished toward one as size approached 100.

$$\text{If } n_j < 100, R_{I,i}^+ = R_{I,i} \sqrt{\frac{100}{n_j}}, \text{ if } n_j \geq 100, R_{I,i}^+ = R_{I,i}$$

Unlike the undirected version of reach, these scores were still highly skewed, so outliers above 65 were recoded to 65 (less than 0.1%), and the final measure was the square root of these scores.

$$R_{i,i}^* = \sqrt{R_{i,i}^+}$$

*Bonacich centrality:* First, outliers with scores above 3.25 (< 0.1% and 4.3 SD above the mean), were recoded to 3.25. The square root was then taken to reduce skew.

$$B_{U,i}^* = \sqrt{B_{U,i}}$$

*Information centrality:* Scores had not been computed for students who were not members of the largest component (i.e., the largest connected cluster), so they were assigned the minimum value of zero. In order to compensate for an inverse relationship between variance and network size and for a negative skew, scores were first multiplied by the ratio of the size of their largest connected cluster ( $lc_j$ ) and the mean of that size across networks and then squared. Squaring produced very small values for this fractional index, so the result was multiplied by 10,000.

$$I_{U,i}^* = 10,000 \left( I_{U,i} \frac{lc_j}{178} \right)^2$$

*Betweenness, symmetrical and incoming.* The same transformation was applied to both of these measures. In each case, variance was highly dependent on network size, and the distribution was positively skewed. To compensate, each was multiplied by the ratio of network size to mean network size, and the cube root was taken of the result.

$$B_i^* = \sqrt[3]{B_i \frac{n_j}{186}}$$

*Measures of Anti-social Attitudes and Behavior*

*Substance Use*

**During the past month, how many times have you:**

Smoked any cigarettes

Had beer, wine, wine coolers, or other liquor

Been drunk from drinking wine, wine coolers, or other liquor

Smoked marijuana (pot, reefer, weed, blunts)

*Not at all .....1*

*One time .....2*

*A few times .....3*

*About once a week .....4*

*More than once a week .....5*

*Substance Use Attitudes*

Anti-use Attitudes

**How wrong do you think it is for someone your age to do any of the following things?**

Smoke cigarettes

Drink beer, wine, or liquor

Use marijuana or pot

*Not at all wrong .....1*

*A little bit wrong .....2*

*Fairly wrong .....3*

*Very wrong.....4*

Expectations for Use

**How much do you agree or disagree with each statement?**

Kids who smoke have more friends

Smoking cigarettes makes you look cool

Smoking cigarettes lets you have more fun

Kids who drink alcohol have more friends

Drinking alcohol is a good way of dealing you're your problems

Drinking alcohol makes you look cool

Drinking alcohol lets you have more fun

Drinking helps you get along with other people

Kids who use marijuana (pot) have more friends

Smoking marijuana (pot) makes you look cool

Smoking marijuana (pot) lets you have more fun

*Strongly disagree .....1*

*Disagree .....2*

*Not sure .....3*

*Agree .....4*

*Strongly agree .....5*

Refusal Intentions

**How likely are you to say “no” when someone tries to get you to:**

- Smoke a cigarette
- Drink beer, wine, or liquor
- Smoke marijuana or hashish
- Use cocaine, methamphetamine (meth), or other hard drugs
- Sniff glue, paint, gas, or other things you inhale to get high

- Definitely would say “no”* 1
- Probably would say “no”* 2
- Not sure* 3
- Probably would not say “no”* 4
- Definitely would not say “no”* 5

Refusal Efficacy

**How confident are you that you could do well in the following situations?**

- Refusing marijuana/pot offered by a friend
- Refusing a cigarette offered by a friend
- Refusing an alcoholic drink offered by a friend

- Not at all confident.....1*
- A little bit confident.....2*
- Somewhat confident .....3*
- Mostly confident.....4*
- Very confident .....5*

Delinquency

**During the past 12 months, how many times have you:**

- Taken something worth less than \$25 that didn’t belong to you
- Taken something worth \$25 or more that didn’t belong to you
- Beat up someone or physically fought with someone because they made you angry (other than just playing around)
- Purposely damaged or destroyed property that did not belong to you
- Broken into or tried to break into a building just for fun or to look around
- Thrown objects such as rocks or bottles at people to hurt or scare them
- Been picked up by the police for breaking a law
- Run away from home
- Skipped school or classes without an excuse
- Carried a hidden weapon
- Avoided paying for things such as movies, rides, food, or computer services
- Taken something from a store that you did not pay for

- Never.....1*
- Once .....2*
- Twice.....3*
- Three or four times.....4*
- Five or more times .....5*

Pretest Comparison of Antisocial Influence Potential for Intervention and Comparison School Districts

| <b>Centrality Measures Based on Undirected Ties</b>        |                           |          |             |          |          |
|------------------------------------------------------------|---------------------------|----------|-------------|----------|----------|
| <b>Centrality Measure</b>                                  | <b>Antisocial Measure</b> | <b>B</b> | <b>S.E.</b> | <b>z</b> | <b>p</b> |
| Composite, undirected                                      | Composite                 | 0.042    | 0.057       | 0.74     | 0.458    |
| Composite, undirected                                      | Substance Use             | 0.070    | 0.047       | 1.50     | 0.135    |
| Composite, undirected                                      | Subst Use Attitudes       | 0.051    | 0.047       | -1.09    | 0.276    |
| Composite, undirected                                      | Delinquency               | -0.002   | 0.045       | -0.05    | 0.957    |
| Total degree (in & out)                                    | Composite                 | 0.034    | 0.056       | 0.60     | 0.550    |
| Total degree (in & out)                                    | Substance Use             | 0.043    | 0.042       | 1.02     | 0.306    |
| Total degree (in & out)                                    | Subst Use Attitudes       | 0.041    | 0.046       | -0.91    | 0.362    |
| Total degree (in & out)                                    | Delinquency               | 0.008    | 0.042       | 0.19     | 0.853    |
| Closeness, undirected                                      | Composite                 | 0.026    | 0.057       | 0.45     | 0.649    |
| Closeness, undirected                                      | Substance Use             | 0.025    | 0.037       | 0.67     | 0.500    |
| Closeness, undirected                                      | Subst Use Attitudes       | 0.025    | 0.047       | -0.53    | 0.594    |
| Closeness, undirected                                      | Delinquency               | 0.009    | 0.042       | 0.20     | 0.839    |
| Reach, undirected                                          | Composite                 | 0.017    | 0.055       | 0.30     | 0.763    |
| Reach, undirected                                          | Substance Use             | 0.040    | 0.036       | 1.09     | 0.277    |
| Reach, undirected                                          | Subst Use Attitudes       | 0.020    | 0.044       | -0.45    | 0.653    |
| Reach, undirected                                          | Delinquency               | -0.002   | 0.042       | -0.06    | 0.954    |
| Bonacich, undirected                                       | Composite                 | 0.054    | 0.068       | 0.80     | 0.422    |
| Bonacich, undirected                                       | Substance Use             | 0.110    | 0.056       | 1.97     | 0.048    |
| Bonacich, undirected                                       | Subst Use Attitudes       | 0.075    | 0.051       | -1.48    | 0.139    |
| Bonacich, undirected                                       | Delinquency               | -0.009   | 0.051       | -0.18    | 0.854    |
| Information centrality                                     | Composite                 | 0.036    | 0.068       | 0.53     | 0.598    |
| Information centrality                                     | Substance Use             | 0.030    | 0.045       | 0.66     | 0.512    |
| Information centrality                                     | Subst Use Attitudes       | 0.037    | 0.055       | -0.68    | 0.498    |
| Information centrality                                     | Delinquency               | 0.004    | 0.050       | 0.08     | 0.933    |
| Betweenness, symmetric                                     | Composite                 | 0.013    | 0.041       | 0.32     | 0.747    |
| Betweenness, symmetric                                     | Substance Use             | 0.000    | 0.044       | 0.00     | 1.000    |
| Betweenness, symmetric                                     | Subst Use Attitudes       | 0.006    | 0.045       | -0.13    | 0.894    |
| Betweenness, symmetric                                     | Delinquency               | -0.005   | 0.029       | -0.16    | 0.871    |
| <b>Centrality Measures Based on Incoming/Directed Ties</b> |                           |          |             |          |          |
| <b>Centrality Measure</b>                                  | <b>Antisocial Measure</b> | <b>B</b> | <b>S.E.</b> | <b>z</b> | <b>p</b> |
| Composite, inward                                          | Composite                 | 0.006    | 0.056       | 0.11     | 0.915    |
| Composite, inward                                          | Substance Use             | -0.013   | 0.049       | -0.25    | 0.799    |
| Composite, inward                                          | Subst Use Attitudes       | 0.023    | 0.048       | -0.49    | 0.626    |
| Composite, inward                                          | Delinquency               | -0.019   | 0.041       | -0.46    | 0.642    |
| In Degree                                                  | Composite                 | 0.000    | 0.054       | 0.01     | 0.994    |
| In Degree                                                  | Substance Use             | -0.023   | 0.050       | -0.47    | 0.636    |
| In Degree                                                  | Subst Use Attitudes       | 0.023    | 0.047       | -0.48    | 0.632    |
| In Degree                                                  | Delinquency               | -0.018   | 0.035       | -0.52    | 0.600    |
| Closeness, In                                              | Composite                 | 0.013    | 0.054       | 0.25     | 0.805    |
| Closeness, In                                              | Substance Use             | -0.002   | 0.049       | -0.05    | 0.961    |
| Closeness, In                                              | Subst Use Attitudes       | 0.026    | 0.044       | -0.59    | 0.556    |
| Closeness, In                                              | Delinquency               | -0.020   | 0.038       | -0.52    | 0.606    |
| Reach, in                                                  | Composite                 | -0.001   | 0.056       | -0.02    | 0.985    |



|                       |                     |        |       |       |       |
|-----------------------|---------------------|--------|-------|-------|-------|
| Reach, in             | Substance Use       | -0.012 | 0.046 | -0.27 | 0.787 |
| Reach, in             | Subst Use Attitudes | 0.023  | 0.047 | -0.49 | 0.626 |
| Reach, in             | Delinquency         | -0.035 | 0.040 | -0.86 | 0.390 |
| Betweenness, incoming | Composite           | 0.019  | 0.044 | 0.43  | 0.668 |
| Betweenness, incoming | Substance Use       | 0.026  | 0.044 | 0.59  | 0.555 |
| Betweenness, incoming | Subst Use Attitudes | 0.002  | 0.043 | -0.06 | 0.955 |
| Betweenness, incoming | Delinquency         | 0.006  | 0.030 | 0.21  | 0.832 |

Note: Undirected composite includes all 6 undirected position measures. Incoming composite does not include betweenness, which is distinctly less correlated with the other 3 than they are with one another. N = 80 schools/cohort combinations, except for measures with substance use, where N = 77.

Program Effect Estimates for All Measures of Antisocial Influence Potential:  
Base Model, Controlling only for Wave

| <b>Centrality Measures Based on Undirected Ties</b>        |                           |          |             |          |          |
|------------------------------------------------------------|---------------------------|----------|-------------|----------|----------|
| <b>Centrality Measure</b>                                  | <b>Antisocial Measure</b> | <b>B</b> | <b>S.E.</b> | <b>Z</b> | <b>p</b> |
| Composite, undirected                                      | Composite                 | -0.052   | 0.019       | -2.70    | 0.007    |
| Composite, undirected                                      | Substance Use             | -0.036   | 0.015       | -2.36    | 0.018    |
| Composite, undirected                                      | Subst Use Attitudes       | -0.044   | 0.021       | 2.07     | 0.038    |
| Composite, undirected                                      | Delinquency               | -0.058   | 0.019       | -2.97    | 0.003    |
| Total degree (in & out)                                    | Composite                 | -0.063   | 0.024       | -2.67    | 0.008    |
| Total degree (in & out)                                    | Substance Use             | -0.027   | 0.013       | -2.01    | 0.044    |
| Total degree (in & out)                                    | Subst Use Attitudes       | -0.040   | 0.018       | 2.23     | 0.026    |
| Total degree (in & out)                                    | Delinquency               | -0.046   | 0.015       | -3.13    | 0.002    |
| Closeness, undirected                                      | Composite                 | -0.039   | 0.017       | -2.36    | 0.018    |
| Closeness, undirected                                      | Substance Use             | -0.019   | 0.012       | -1.55    | 0.121    |
| Closeness, undirected                                      | Subst Use Attitudes       | -0.029   | 0.017       | 1.70     | 0.090    |
| Closeness, undirected                                      | Delinquency               | -0.039   | 0.015       | -2.64    | 0.008    |
| Reach, undirected                                          | Composite                 | -0.046   | 0.017       | -2.67    | 0.008    |
| Reach, undirected                                          | Substance Use             | -0.025   | 0.013       | -1.87    | 0.062    |
| Reach, undirected                                          | Subst Use Attitudes       | -0.036   | 0.017       | 2.05     | 0.040    |
| Reach, undirected                                          | Delinquency               | -0.045   | 0.015       | -2.95    | 0.003    |
| Bonacich, undirected                                       | Composite                 | -0.072   | 0.024       | -2.98    | 0.003    |
| Bonacich, undirected                                       | Substance Use             | -0.049   | 0.018       | -2.66    | 0.008    |
| Bonacich, undirected                                       | Subst Use Attitudes       | -0.057   | 0.023       | 2.47     | 0.014    |
| Bonacich, undirected                                       | Delinquency               | -0.066   | 0.020       | -3.34    | 0.001    |
| Information centrality                                     | Composite                 | -0.053   | 0.020       | -2.70    | 0.007    |
| Information centrality                                     | Substance Use             | -0.030   | 0.016       | -1.92    | 0.055    |
| Information centrality                                     | Subst Use Attitudes       | -0.042   | 0.020       | 2.06     | 0.039    |
| Information centrality                                     | Delinquency               | -0.053   | 0.017       | -3.05    | 0.002    |
| Betweenness, symmetric                                     | Composite                 | -0.014   | 0.013       | -1.12    | 0.264    |
| Betweenness, symmetric                                     | Substance Use             | -0.004   | 0.011       | -0.36    | 0.721    |
| Betweenness, symmetric                                     | Subst Use Attitudes       | -0.015   | 0.015       | 1.03     | 0.301    |
| Betweenness, symmetric                                     | Delinquency               | -0.015   | 0.012       | -1.27    | 0.206    |
| <b>Centrality Measures Based on Incoming/Directed Ties</b> |                           |          |             |          |          |
| <b>Centrality Measure</b>                                  | <b>Antisocial Measure</b> | <b>B</b> | <b>S.E.</b> | <b>z</b> | <b>p</b> |
| Composite, inward                                          | Composite                 | -0.031   | 0.016       | -1.97    | 0.049    |
| Composite, inward                                          | Substance Use             | -0.015   | 0.013       | -1.11    | 0.268    |
| Composite, inward                                          | Subst Use Attitudes       | -0.019   | 0.016       | 1.21     | 0.225    |
| Composite, inward                                          | Delinquency               | -0.037   | 0.015       | -2.55    | 0.011    |
| In Degree                                                  | Composite                 | -0.029   | 0.015       | -1.94    | 0.052    |
| In Degree                                                  | Substance Use             | -0.014   | 0.013       | -1.10    | 0.272    |
| In Degree                                                  | Subst Use Attitudes       | -0.020   | 0.016       | 1.29     | 0.198    |
| In Degree                                                  | Delinquency               | -0.034   | 0.014       | -2.37    | 0.018    |
| Closeness, In                                              | Composite                 | -0.023   | 0.015       | -1.48    | 0.140    |
| Closeness, In                                              | Substance Use             | -0.009   | 0.013       | -0.70    | 0.486    |
| Closeness, In                                              | Subst Use Attitudes       | -0.011   | 0.015       | 0.74     | 0.462    |
| Closeness, In                                              | Delinquency               | -0.033   | 0.014       | -2.38    | 0.017    |
| Reach, in                                                  | Composite                 | -0.037   | 0.016       | -2.30    | 0.021    |

|                       |                     |        |       |       |       |
|-----------------------|---------------------|--------|-------|-------|-------|
| Reach, in             | Substance Use       | -0.020 | 0.014 | -1.44 | 0.149 |
| Reach, in             | Subst Use Attitudes | -0.025 | 0.017 | 1.52  | 0.129 |
| Reach, in             | Delinquency         | -0.042 | 0.015 | -2.85 | 0.004 |
| Betweenness, incoming | Composite           | -0.008 | 0.013 | -0.58 | 0.560 |
| Betweenness, incoming | Substance Use       | 0.006  | 0.013 | 0.46  | 0.649 |
| Betweenness, incoming | Subst Use Attitudes | -0.013 | 0.015 | 0.90  | 0.367 |
| Betweenness, incoming | Delinquency         | -0.007 | 0.012 | -0.60 | 0.550 |

Note: Undirected composite includes all 6 undirected position measures. Incoming composite does not include betweenness, which is distinctly less correlated with the other 3 than they are with one another. N's = 256 school/cohort/wave combinations, except measures with substance use, where N = 255, and for substance combined with composite incoming measures and with Bonacich centrality, where N = 253.

Program Effect Estimates for All Measures of Antisocial Influence Potential:  
Controlling for Wave, Pretest, State, and Number of Students

| <b>Centrality Measures Based on Undirected Ties</b>        |                           |               |             |          |          |
|------------------------------------------------------------|---------------------------|---------------|-------------|----------|----------|
| <b>Centrality Measure</b>                                  | <b>Antisocial Measure</b> | <b>Std. b</b> | <b>S.E.</b> | <b>z</b> | <b>p</b> |
| Composite, undirected                                      | Composite                 | -0.058        | 0.018       | -3.17    | 0.002    |
| Composite, undirected                                      | Substance Use             | -0.038        | 0.015       | -2.61    | 0.009    |
| Composite, undirected                                      | Subst Use Attitudes       | -0.051        | 0.020       | 2.56     | 0.010    |
| Composite, undirected                                      | Delinquency               | -0.048        | 0.015       | -3.10    | 0.002    |
| Total degree (in & out)                                    | Composite                 | -0.050        | 0.015       | -3.34    | 0.001    |
| Total degree (in & out)                                    | Substance Use             | -0.029        | 0.013       | -2.30    | 0.021    |
| Total degree (in & out)                                    | Subst Use Attitudes       | -0.044        | 0.016       | 2.75     | 0.006    |
| Total degree (in & out)                                    | Delinquency               | -0.044        | 0.013       | -3.42    | 0.001    |
| Closeness, undirected                                      | Composite                 | -0.036        | 0.015       | -2.50    | 0.012    |
| Closeness, undirected                                      | Substance Use             | -0.019        | 0.012       | -1.64    | 0.101    |
| Closeness, undirected                                      | Subst Use Attitudes       | -0.028        | 0.015       | 1.93     | 0.054    |
| Closeness, undirected                                      | Delinquency               | -0.036        | 0.014       | -2.62    | 0.009    |
| Reach, undirected                                          | Composite                 | -0.045        | 0.016       | -2.73    | 0.006    |
| Reach, undirected                                          | Substance Use             | -0.026        | 0.013       | -1.97    | 0.049    |
| Reach, undirected                                          | Subst Use Attitudes       | -0.035        | 0.016       | 2.21     | 0.027    |
| Reach, undirected                                          | Delinquency               | -0.041        | 0.015       | -2.83    | 0.005    |
| Bonacich, undirected                                       | Composite                 | -0.079        | 0.021       | -3.78    | 0.000    |
| Bonacich, undirected                                       | Substance Use             | -0.053        | 0.018       | -2.95    | 0.003    |
| Bonacich, undirected                                       | Subst Use Attitudes       | -0.068        | 0.021       | 3.17     | 0.002    |
| Bonacich, undirected                                       | Delinquency               | -0.061        | 0.017       | -3.69    | 0.000    |
| Information centrality                                     | Composite                 | -0.052        | 0.018       | -2.91    | 0.004    |
| Information centrality                                     | Substance Use             | -0.031        | 0.015       | -2.01    | 0.044    |
| Information centrality                                     | Subst Use Attitudes       | -0.041        | 0.018       | 2.26     | 0.024    |
| Information centrality                                     | Delinquency               | -0.048        | 0.016       | -3.08    | 0.002    |
| Betweenness, symmetric                                     | Composite                 | -0.014        | 0.011       | -1.26    | 0.207    |
| Betweenness, symmetric                                     | Substance Use             | -0.004        | 0.010       | -0.41    | 0.680    |
| Betweenness, symmetric                                     | Subst Use Attitudes       | -0.012        | 0.013       | 0.94     | 0.345    |
| Betweenness, symmetric                                     | Delinquency               | -0.013        | 0.011       | -1.25    | 0.212    |
| <b>Centrality Measures Based on Incoming/Directed Ties</b> |                           |               |             |          |          |
| <b>Centrality Measure</b>                                  | <b>Antisocial Measure</b> | <b>Std. b</b> | <b>S.E.</b> | <b>z</b> | <b>p</b> |
| Composite, inward                                          | Composite                 | -0.027        | 0.014       | -1.90    | 0.057    |
| Composite, inward                                          | Substance Use             | -0.014        | 0.013       | -1.09    | 0.277    |
| Composite, inward                                          | Subst Use Attitudes       | -0.017        | 0.015       | 1.19     | 0.233    |
| Composite, inward                                          | Delinquency               | -0.031        | 0.013       | -2.34    | 0.020    |
| In Degree                                                  | Composite                 | -0.028        | 0.013       | -2.07    | 0.039    |
| In Degree                                                  | Substance Use             | -0.014        | 0.012       | -1.14    | 0.254    |
| In Degree                                                  | Subst Use Attitudes       | -0.020        | 0.014       | 1.46     | 0.145    |
| In Degree                                                  | Delinquency               | -0.029        | 0.012       | -2.48    | 0.013    |
| Closeness, In                                              | Composite                 | -0.018        | 0.014       | -1.31    | 0.191    |
| Closeness, In                                              | Substance Use             | -0.008        | 0.013       | -0.60    | 0.547    |
| Closeness, In                                              | Subst Use Attitudes       | -0.009        | 0.014       | 0.62     | 0.533    |
| Closeness, In                                              | Delinquency               | -0.027        | 0.012       | -2.21    | 0.027    |
| Reach, in                                                  | Composite                 | -0.032        | 0.015       | -2.21    | 0.027    |

|                       |                     |        |       |       |       |
|-----------------------|---------------------|--------|-------|-------|-------|
| Reach, in             | Substance Use       | -0.024 | 0.014 | -1.74 | 0.082 |
| Reach, in             | Subst Use Attitudes | -0.022 | 0.015 | 1.47  | 0.142 |
| Reach, in             | Delinquency         | -0.035 | 0.013 | -2.70 | 0.007 |
| Betweenness, incoming | Composite           | -0.009 | 0.012 | -0.77 | 0.440 |
| Betweenness, incoming | Substance Use       | 0.004  | 0.012 | 0.31  | 0.759 |
| Betweenness, incoming | Subst Use Attitudes | -0.012 | 0.013 | 0.91  | 0.364 |
| Betweenness, incoming | Delinquency         | -0.006 | 0.011 | -0.59 | 0.556 |

Note: Undirected composite includes all 6 undirected position measures. Incoming composite does not include betweenness, which is distinctly less correlated with the other 3 than they are with one another. N's = 256 school/cohort/wave combinations, except measures with substance use, where N = 255, and for substance combined with composite incoming measures and with Bonacich centrality, where N = 253.
